# Supplementary material for: Structural differences between the active sites of the Ni-A and Ni-B states of the [NiFe] hydrogenase: an approach by quantum chemistry and single crystal ENDOR spectroscopy
Source: Royal Society of Chemistry journal article supplement (doi:10.1039/c5cp01322d), 2015-01-01
Supplement: c5cp01322d1.pdf [file c5cp01322d1.pdf]

## Supplementary Information

**Table S1.** Experimental and calculated g-tensor for large Ni-A models with varying bridging ligands.

|                            | $g_z$ | $g_y$ | $g_x$ |
|----------------------------|-------|-------|-------|
| Experimental               |       |       |       |
| Ni-A                       | 2.01  | 2.24  | 2.32  |
| Ni-B                       | 2.01  | 2.16  | 2.33  |
| Calculated                 |       |       |       |
| OH $\alpha$                | 2.04  | 2.14  | 2.20  |
| OH $\beta$                 | 2.04  | 2.14  | 2.19  |
| OOH $^-$                   | 2.05  | 2.13  | 2.15  |
| S=O, OH $\alpha$           | 2.04  | 2.18  | 2.19  |
| H $_2$ O                   | 2.07  | 2.08  | 2.18  |
| O $^{2-}$                  | 2.08  | 2.16  | 2.20  |
| OH $\alpha$ rotated Cys549 | 2.04  | 2.15  | 2.19  |

**Table S2.** Mulliken spin populations of selected atoms in the large OH $\alpha$  model. The numbering of the atoms according to the geometry as specified for the OH $\alpha$  model.

|             |       |                   |       |
|-------------|-------|-------------------|-------|
| Ni          | 0.81  | S26 Cys-549       | 0.24  |
| Fe          | -0.01 | S34 Cys-84        | -0.02 |
| S10 Cys-81  | -0.02 | O3 OH $^-$ bridge | 0.01  |
| S18 Cys-546 | -0.01 |                   |       |

*Cartesian Coordinates for Geometry Optimized Small Models (Angstroems)*

OOH Model

|    |           |           |           |
|----|-----------|-----------|-----------|
| Ni | 58.181945 | 47.547701 | 85.300216 |
| Fe | 57.511263 | 50.068614 | 86.613667 |
| O  | 57.391089 | 48.040960 | 87.045782 |
| C  | 55.735211 | 50.534470 | 87.066094 |
| N  | 54.618261 | 50.867931 | 87.282594 |
| C  | 58.134115 | 50.398770 | 88.371942 |
| N  | 58.596845 | 50.598131 | 89.445524 |
| C  | 57.816259 | 51.683507 | 86.139952 |
| O  | 58.024236 | 52.794120 | 85.803847 |
| S  | 59.470473 | 46.671528 | 83.759636 |
| C  | 60.661482 | 47.958701 | 83.178382 |
| H  | 61.336985 | 48.254589 | 84.003023 |
| H  | 60.089742 | 48.865504 | 82.901493 |
| C  | 61.452790 | 47.423572 | 81.981015 |
| H  | 62.173215 | 48.178456 | 81.595520 |
| H  | 62.023424 | 46.514172 | 82.261799 |
| H  | 60.769928 | 47.139729 | 81.154498 |
| S  | 56.880298 | 45.689976 | 85.106736 |
| C  | 57.633885 | 44.695034 | 86.476941 |
| H  | 57.875040 | 45.390171 | 87.304384 |
| H  | 56.841154 | 44.011475 | 86.849535 |
| C  | 58.867056 | 43.901998 | 86.039082 |
| H  | 59.317352 | 43.343975 | 86.891000 |
| H  | 58.603487 | 43.177034 | 85.242345 |
| H  | 59.627231 | 44.587854 | 85.615448 |
| S  | 59.558892 | 49.224562 | 85.944424 |
| C  | 60.328287 | 48.410400 | 87.413664 |
| H  | 60.603188 | 49.224073 | 88.111064 |
| H  | 59.525359 | 47.834056 | 87.907696 |
| C  | 61.511796 | 47.536966 | 86.997994 |
| H  | 62.326732 | 48.146254 | 86.555340 |
| H  | 61.194657 | 46.797439 | 86.234359 |
| H  | 61.929849 | 46.987873 | 87.869644 |
| S  | 56.909800 | 49.356428 | 84.453358 |
| C  | 55.150866 | 48.823190 | 84.542870 |
| H  | 54.549373 | 49.742444 | 84.675253 |
| H  | 55.037754 | 48.244973 | 85.476489 |
| C  | 54.749165 | 48.019982 | 83.306468 |
| H  | 54.903872 | 48.606359 | 82.376864 |
| H  | 53.678018 | 47.724315 | 83.356161 |
| H  | 55.354916 | 47.096116 | 83.227832 |
| O  | 56.069458 | 47.504166 | 87.357117 |
| H  | 56.025081 | 46.784104 | 86.649442 |

H<sub>2</sub>O Model

|    |           |           |           |
|----|-----------|-----------|-----------|
| Ni | 59.216145 | 47.743041 | 85.279003 |
| Fe | 57.952497 | 50.319783 | 86.864937 |
| O  | 56.831352 | 48.669037 | 87.708885 |
| C  | 56.220597 | 51.057012 | 86.699173 |
| N  | 55.057248 | 51.277198 | 86.632641 |
| C  | 58.091639 | 50.805694 | 88.684478 |
| N  | 58.141081 | 50.902091 | 89.865221 |
| C  | 58.759878 | 51.727633 | 86.319034 |
| O  | 59.302894 | 52.699381 | 85.958989 |
| S  | 59.704933 | 47.003067 | 83.323993 |
| C  | 59.217887 | 48.135059 | 81.947429 |
| H  | 60.121574 | 48.714719 | 81.673374 |
| H  | 58.474755 | 48.859563 | 82.330165 |
| C  | 58.686269 | 47.354994 | 80.743468 |
| H  | 58.455917 | 48.039041 | 79.899634 |
| H  | 59.426363 | 46.611031 | 80.387223 |
| H  | 57.760057 | 46.806338 | 81.002057 |
| S  | 59.397171 | 45.895237 | 86.399511 |
| C  | 58.607857 | 44.586476 | 85.363690 |
| H  | 57.551159 | 44.864642 | 85.187776 |
| H  | 59.105762 | 44.586813 | 84.373794 |
| C  | 58.716084 | 43.223751 | 86.051143 |
| H  | 58.243394 | 42.428828 | 85.437180 |
| H  | 59.776574 | 42.949479 | 86.215600 |
| H  | 58.217553 | 43.235235 | 87.040587 |
| S  | 59.898607 | 49.074868 | 86.944614 |
| C  | 59.992244 | 48.202696 | 88.568758 |
| H  | 59.745429 | 48.967937 | 89.329045 |
| H  | 59.205200 | 47.423577 | 88.573453 |
| C  | 61.374059 | 47.585552 | 88.781893 |
| H  | 62.166544 | 48.357695 | 88.738044 |
| H  | 61.587775 | 46.821615 | 88.010347 |
| H  | 61.426090 | 47.093235 | 89.775083 |
| S  | 57.850278 | 49.440633 | 84.723319 |
| C  | 56.281136 | 48.450305 | 84.727896 |
| H  | 55.488832 | 49.191606 | 84.950165 |
| H  | 56.345375 | 47.749494 | 85.580320 |
| C  | 56.036601 | 47.710862 | 83.416690 |
| H  | 55.959087 | 48.411805 | 82.563003 |
| H  | 55.088730 | 47.136982 | 83.473058 |
| H  | 55.969627 | 49.145415 | 87.612581 |
| H  | 56.860595 | 46.999699 | 83.211001 |
| H  | 57.110706 | 48.858058 | 88.636817 |

O<sup>2-</sup> Model

|    |           |           |           |
|----|-----------|-----------|-----------|
| Ni | 58.327267 | 47.502589 | 85.094526 |
| Fe | 57.744251 | 49.718315 | 86.777250 |
| O  | 57.425014 | 47.830600 | 86.650128 |
| C  | 55.939416 | 50.118233 | 87.153637 |
| N  | 54.798345 | 50.396026 | 87.347456 |
| C  | 58.216897 | 49.611135 | 88.602497 |
| N  | 58.551765 | 49.561516 | 89.743256 |
| C  | 58.178953 | 51.387955 | 86.698897 |
| O  | 58.500843 | 52.531572 | 86.617337 |
| S  | 59.172953 | 46.923268 | 83.014841 |
| C  | 59.925560 | 48.493381 | 82.436631 |
| H  | 60.696027 | 48.811992 | 83.170299 |
| H  | 59.143508 | 49.282414 | 82.447470 |
| C  | 60.531399 | 48.344446 | 81.036023 |
| H  | 60.995511 | 49.290617 | 80.663710 |
| H  | 61.308102 | 47.548843 | 81.031825 |
| H  | 59.748162 | 48.031312 | 80.311804 |
| S  | 58.498666 | 45.264403 | 85.539805 |
| C  | 57.603470 | 45.058092 | 87.127716 |
| H  | 57.268223 | 46.099550 | 87.374878 |
| H  | 56.707103 | 44.412100 | 86.977958 |
| C  | 58.489792 | 44.482352 | 88.238438 |
| H  | 57.922266 | 44.331233 | 89.189363 |
| H  | 58.938523 | 43.505732 | 87.945265 |
| H  | 59.324497 | 45.178264 | 88.450680 |
| S  | 59.965912 | 48.944229 | 86.017734 |
| C  | 60.547556 | 47.860732 | 87.384256 |
| H  | 60.946817 | 48.508843 | 88.190518 |
| H  | 59.637262 | 47.373799 | 87.779434 |
| C  | 61.566172 | 46.830418 | 86.892420 |
| H  | 62.437744 | 47.323257 | 86.407453 |
| H  | 61.072097 | 46.166250 | 86.154332 |
| H  | 61.945027 | 46.199427 | 87.732495 |
| S  | 57.301573 | 49.476157 | 84.413721 |
| C  | 55.601531 | 48.773892 | 84.320672 |
| H  | 54.875398 | 49.587485 | 84.519431 |
| H  | 55.546048 | 48.068568 | 85.172468 |
| C  | 55.374728 | 48.083286 | 82.972629 |
| H  | 55.396412 | 48.817638 | 82.137056 |
| H  | 54.393029 | 47.552172 | 82.938438 |
| H  | 56.192176 | 47.355619 | 82.782960 |

## OH-a model

|    |           |           |           |
|----|-----------|-----------|-----------|
| Ni | 58.174677 | 47.392177 | 85.098313 |
| Fe | 57.730524 | 49.763481 | 86.747995 |
| O  | 57.314198 | 47.761524 | 86.800059 |
| C  | 55.907380 | 50.111576 | 87.099941 |
| N  | 54.736479 | 50.242794 | 87.247913 |
| C  | 58.206188 | 49.777721 | 88.577226 |
| N  | 58.547616 | 49.781209 | 89.713060 |
| C  | 58.130671 | 51.419056 | 86.585849 |
| O  | 58.401041 | 52.561622 | 86.467109 |
| S  | 58.904197 | 46.857685 | 83.074735 |
| C  | 59.779442 | 48.361852 | 82.471722 |
| H  | 60.548605 | 48.637409 | 83.219586 |
| H  | 59.059982 | 49.203195 | 82.429116 |
| C  | 60.407441 | 48.098080 | 81.100324 |
| H  | 60.946726 | 48.992856 | 80.718458 |
| H  | 61.126371 | 47.254518 | 81.150747 |
| H  | 59.628856 | 47.822154 | 80.359077 |
| S  | 58.580760 | 45.246037 | 85.556675 |
| C  | 57.837382 | 44.902449 | 87.210239 |
| H  | 57.503425 | 45.882758 | 87.606767 |
| H  | 56.940968 | 44.258030 | 87.079888 |
| C  | 58.840522 | 44.234785 | 88.156856 |
| H  | 58.376797 | 43.997698 | 89.141086 |
| H  | 59.238755 | 43.291322 | 87.727409 |
| H  | 59.702317 | 44.905206 | 88.337219 |
| S  | 59.801711 | 48.898440 | 86.082613 |
| C  | 60.395597 | 47.865073 | 87.483600 |
| H  | 60.690525 | 48.559586 | 88.293145 |
| H  | 59.523284 | 47.299994 | 87.856366 |
| C  | 61.527706 | 46.940408 | 87.038979 |
| H  | 62.368686 | 47.516722 | 86.599730 |
| H  | 61.147447 | 46.230252 | 86.277626 |
| H  | 61.922424 | 46.353364 | 87.897909 |
| S  | 57.315096 | 49.403992 | 84.465989 |
| C  | 55.548971 | 48.956271 | 84.174063 |
| H  | 54.937124 | 49.838082 | 84.443041 |
| H  | 55.263038 | 48.159484 | 84.886006 |
| C  | 55.359122 | 48.498433 | 82.726577 |
| H  | 55.576253 | 49.326201 | 82.021049 |
| H  | 54.318488 | 48.150391 | 82.543685 |
| H  | 56.339514 | 47.749571 | 86.714281 |
| H  | 56.065519 | 47.675086 | 82.495176 |

## OH-b model

|    |           |           |           |
|----|-----------|-----------|-----------|
| Ni | 58.325502 | 47.478474 | 85.202096 |
| Fe | 57.680376 | 49.879495 | 86.680446 |
| O  | 57.248954 | 47.879542 | 86.754153 |
| C  | 55.870253 | 50.318968 | 87.008472 |
| N  | 54.727964 | 50.601438 | 87.158622 |
| C  | 58.116843 | 49.825923 | 88.515416 |
| N  | 58.424372 | 49.683905 | 89.653287 |
| C  | 58.095255 | 51.530923 | 86.509451 |
| O  | 58.388370 | 52.668350 | 86.394864 |
| S  | 59.106163 | 46.856177 | 83.225440 |
| C  | 59.787780 | 48.396295 | 82.477429 |
| H  | 60.454144 | 48.871808 | 83.223857 |
| H  | 58.959644 | 49.108298 | 82.291385 |
| C  | 60.546425 | 48.073542 | 81.187131 |
| H  | 60.966897 | 48.991015 | 80.719036 |
| H  | 61.381295 | 47.371142 | 81.387723 |
| H  | 59.877829 | 47.585843 | 80.447315 |
| S  | 58.972485 | 45.444739 | 85.865447 |
| C  | 58.030293 | 45.066843 | 87.409683 |
| H  | 58.558962 | 45.489496 | 88.290989 |
| H  | 57.043468 | 45.564127 | 87.353631 |
| C  | 57.870567 | 43.552345 | 87.578758 |
| H  | 57.324121 | 43.296640 | 88.513912 |
| H  | 57.316663 | 43.125674 | 86.718647 |
| H  | 58.860801 | 43.052686 | 87.611107 |
| S  | 59.828717 | 49.115432 | 86.040073 |
| C  | 60.646199 | 48.281592 | 87.463731 |
| H  | 60.912256 | 49.069033 | 88.194447 |
| H  | 59.905009 | 47.634654 | 87.965820 |
| C  | 61.848857 | 47.463083 | 86.995309 |
| H  | 62.575659 | 48.096307 | 86.445930 |
| H  | 61.499610 | 46.656176 | 86.321156 |
| H  | 62.374757 | 46.996831 | 87.858133 |
| S  | 57.271341 | 49.373578 | 84.440980 |
| C  | 55.561206 | 48.687732 | 84.373747 |
| H  | 54.869432 | 49.533529 | 84.547918 |
| H  | 55.461984 | 48.015589 | 85.245511 |
| C  | 55.322090 | 47.971349 | 83.043672 |
| H  | 55.371599 | 48.681570 | 82.192250 |
| H  | 54.324057 | 47.480605 | 83.025489 |
| H  | 56.104627 | 47.203478 | 82.875273 |
| H  | 57.694896 | 47.602124 | 87.577837 |

## Volbeda S model

|    |           |           |           |
|----|-----------|-----------|-----------|
| C  | 6.258210  | 0.804389  | 6.505860  |
| C  | 7.205992  | 1.178513  | 7.649768  |
| S  | 6.374339  | 1.246517  | 9.291079  |
| C  | 11.044679 | -2.033731 | 9.524973  |
| C  | 9.913698  | -3.000654 | 9.867099  |
| S  | 8.473099  | -2.722472 | 8.737698  |
| O  | 8.154665  | -1.146814 | 9.093378  |
| C  | 3.009432  | -1.618208 | 12.838425 |
| C  | 4.522945  | -1.534437 | 12.621780 |
| S  | 4.963403  | -0.114914 | 11.529195 |
| C  | 2.975407  | -0.992755 | 8.563301  |
| C  | 3.683393  | -2.288064 | 8.958042  |
| S  | 5.453269  | -2.223113 | 8.465980  |
| Fe | 6.678143  | -3.893405 | 9.552277  |
| C  | 5.126564  | -4.654747 | 10.334796 |
| N  | 4.145236  | -5.099859 | 10.828236 |
| C  | 7.777391  | -5.028010 | 10.595040 |
| N  | 8.513376  | -5.685640 | 11.254063 |
| C  | 6.588498  | -5.006102 | 8.249165  |
| O  | 6.517688  | -5.766989 | 7.350970  |
| Ni | 6.525407  | -0.819560 | 10.107722 |
| O  | 6.696281  | -2.508015 | 11.015968 |
| H  | 6.778574  | 0.821615  | 5.519626  |
| H  | 5.393573  | 1.498656  | 6.459311  |
| H  | 5.862872  | -0.215983 | 6.676701  |
| H  | 7.658281  | 2.181222  | 7.483656  |
| H  | 8.018990  | 0.432461  | 7.741778  |
| H  | 11.429820 | -2.215470 | 8.500575  |
| H  | 11.890206 | -2.132451 | 10.238744 |
| H  | 10.182537 | -4.068473 | 9.766698  |
| H  | 9.553553  | -2.862676 | 10.903425 |
| H  | 2.751010  | -2.477403 | 13.494859 |
| H  | 2.488950  | -1.763600 | 11.872375 |
| H  | 2.606482  | -0.690928 | 13.299379 |
| H  | 5.046953  | -1.425407 | 13.595798 |
| H  | 4.917698  | -2.451990 | 12.146449 |
| H  | 1.911177  | -1.013214 | 8.886033  |
| H  | 3.003540  | -0.833473 | 7.465560  |
| H  | 3.474376  | -0.133701 | 9.052780  |
| H  | 3.242228  | -3.180808 | 8.472929  |
| H  | 3.637122  | -2.465983 | 10.044038 |
| H  | 10.664355 | -0.994712 | 9.566045  |
| H  | 7.530663  | -2.584759 | 11.517263 |

*Cartesian Coordinates for Geometry Optimized Large Models (Angstroems)*

OOH Model

|    |           |           |           |
|----|-----------|-----------|-----------|
| Ni | 57.942657 | 47.213736 | 85.018751 |
| Fe | 57.475330 | 49.490793 | 86.662039 |
| O  | 56.578415 | 47.730400 | 86.279899 |
| C  | 55.737264 | 50.005536 | 87.096982 |
| N  | 54.625405 | 50.218273 | 87.415075 |
| C  | 57.830756 | 49.065047 | 88.420212 |
| N  | 58.030701 | 48.683739 | 89.518880 |
| C  | 58.029121 | 51.104543 | 86.827683 |
| O  | 58.342876 | 52.215446 | 86.987774 |
| S  | 58.688517 | 46.576851 | 83.029553 |
| C  | 59.464733 | 48.049346 | 82.256243 |
| H  | 59.856504 | 48.676234 | 83.077953 |
| H  | 58.692613 | 48.646889 | 81.733410 |
| C  | 60.594032 | 47.640669 | 81.310369 |
| H  | 61.035246 | 48.533047 | 80.819866 |
| H  | 61.397336 | 47.116828 | 81.863421 |
| H  | 60.237146 | 46.961454 | 80.514294 |
| S  | 58.643554 | 45.285825 | 85.795881 |
| C  | 58.089229 | 45.202880 | 87.544364 |
| H  | 58.372307 | 46.144067 | 88.054328 |
| H  | 56.991175 | 45.150444 | 87.561387 |
| C  | 58.671699 | 44.019532 | 88.315733 |
| H  | 58.348358 | 44.095830 | 89.372678 |
| H  | 58.327716 | 43.049965 | 87.904055 |
| H  | 59.780582 | 44.019594 | 88.299540 |
| S  | 59.576071 | 48.613557 | 85.952726 |
| C  | 60.722999 | 47.941882 | 87.244172 |
| H  | 60.627354 | 48.614647 | 88.116313 |
| H  | 60.325215 | 46.957085 | 87.544183 |
| C  | 62.197482 | 47.815237 | 86.787498 |
| H  | 62.619739 | 48.799235 | 86.505894 |
| H  | 62.282905 | 47.137851 | 85.916693 |
| H  | 62.802237 | 47.398210 | 87.616699 |
| S  | 57.198636 | 49.354891 | 84.332902 |
| C  | 55.383249 | 49.281415 | 84.010352 |
| H  | 54.968994 | 50.229405 | 84.400517 |
| H  | 54.966103 | 48.463529 | 84.624864 |
| C  | 55.016466 | 49.114833 | 82.524202 |
| H  | 55.416736 | 49.964643 | 81.932333 |
| H  | 53.914599 | 49.108475 | 82.423837 |
| N  | 55.486442 | 47.849739 | 81.983358 |
| H  | 56.462068 | 47.572295 | 82.165646 |
| C  | 54.629806 | 46.909464 | 81.485954 |
| O  | 53.412815 | 47.071628 | 81.365562 |
| C  | 55.310749 | 45.576321 | 81.109317 |
| H  | 54.618611 | 45.050831 | 80.429385 |
| H  | 55.435690 | 44.967797 | 82.025935 |
| N  | 56.609286 | 45.724205 | 80.477460 |



|   |           |           |           |
|---|-----------|-----------|-----------|
| H | 57.433328 | 45.751242 | 81.096733 |
| C | 56.698662 | 46.157936 | 79.182172 |
| O | 55.701769 | 46.318286 | 78.467715 |
| C | 58.111648 | 46.439855 | 78.681637 |
| H | 58.379247 | 47.492616 | 78.899752 |
| H | 58.136349 | 46.302991 | 77.586541 |
| H | 58.867791 | 45.785992 | 79.153398 |
| O | 51.290404 | 47.484983 | 84.802228 |
| O | 49.597533 | 46.164067 | 85.516411 |
| C | 50.088539 | 47.078793 | 84.779401 |
| C | 49.122932 | 47.780945 | 83.803824 |
| H | 49.646297 | 48.039977 | 82.865023 |
| H | 48.770464 | 48.726731 | 84.262370 |
| H | 48.241414 | 47.148899 | 83.592082 |
| H | 52.304745 | 47.149186 | 86.092766 |
| N | 52.846937 | 46.922172 | 86.981564 |
| H | 53.774548 | 47.328196 | 87.145637 |
| C | 52.339607 | 46.003894 | 87.813535 |
| N | 51.229919 | 45.325643 | 87.463238 |
| H | 50.630749 | 45.642254 | 86.620253 |
| H | 50.733201 | 44.829401 | 88.202441 |
| N | 52.946833 | 45.709643 | 89.002237 |
| H | 52.451840 | 45.035067 | 89.584284 |
| C | 53.823692 | 46.648853 | 89.706055 |
| H | 54.321511 | 46.090404 | 90.520089 |
| H | 54.624769 | 46.961716 | 89.014392 |
| C | 53.085738 | 47.890049 | 90.224196 |
| H | 52.404136 | 47.615752 | 91.055977 |
| H | 52.442707 | 48.260883 | 89.402271 |
| C | 54.025889 | 49.028002 | 90.638248 |
| H | 54.534279 | 48.801781 | 91.597858 |
| H | 54.823126 | 49.144657 | 89.875253 |
| C | 53.275722 | 50.366429 | 90.767665 |
| H | 53.993922 | 51.172894 | 91.022401 |
| H | 52.517014 | 50.322941 | 91.571308 |
| N | 52.565179 | 50.714904 | 89.548807 |
| H | 53.125374 | 50.759308 | 88.681067 |
| C | 51.206930 | 50.798319 | 89.492411 |
| O | 50.453327 | 50.597383 | 90.455016 |
| C | 50.633133 | 51.106191 | 88.094454 |
| H | 49.639634 | 51.563171 | 88.270913 |
| C | 50.544788 | 49.854114 | 87.188186 |
| H | 51.366902 | 49.153366 | 87.431281 |
| H | 49.592871 | 49.309088 | 87.316161 |
| C | 50.759898 | 50.410109 | 85.770318 |
| H | 51.071052 | 49.615802 | 85.067910 |
| H | 49.828178 | 50.883707 | 85.397998 |
| C | 51.836569 | 51.478662 | 85.990387 |
| H | 52.849883 | 51.025955 | 86.005473 |
| H | 51.813657 | 52.274586 | 85.224005 |
| N | 51.492601 | 52.017821 | 87.319405 |
| C | 51.831600 | 53.234815 | 87.842208 |

|   |           |           |           |
|---|-----------|-----------|-----------|
| O | 51.353073 | 53.627024 | 88.918634 |
| C | 52.904062 | 54.031948 | 87.104230 |
| H | 52.809676 | 55.077757 | 87.451341 |
| H | 52.740160 | 54.024534 | 86.008859 |
| C | 54.303759 | 53.473892 | 87.432890 |
| H | 54.469580 | 53.468743 | 88.527776 |
| H | 54.433758 | 52.436265 | 87.080925 |
| H | 55.096579 | 54.098432 | 86.976315 |
| H | 58.046901 | 47.249377 | 90.520711 |
| O | 58.266628 | 46.455725 | 91.084261 |
| C | 59.551610 | 46.678722 | 91.631506 |
| H | 59.934816 | 45.704792 | 91.996059 |
| H | 60.268569 | 47.035093 | 90.853192 |
| C | 59.556609 | 47.665756 | 92.808503 |
| H | 60.559076 | 47.662995 | 93.290304 |
| H | 58.827092 | 47.341213 | 93.576751 |
| N | 59.214152 | 49.011057 | 92.367012 |
| H | 59.127864 | 49.180424 | 91.357791 |
| C | 58.764699 | 49.960963 | 93.232721 |
| O | 58.645259 | 49.773580 | 94.448697 |
| C | 58.336398 | 51.285034 | 92.575574 |
| H | 58.272820 | 52.016673 | 93.404117 |
| C | 56.998037 | 51.171712 | 91.799004 |
| H | 56.131864 | 51.364673 | 92.456336 |
| H | 56.888569 | 50.153993 | 91.378212 |
| C | 57.136559 | 52.184983 | 90.646820 |
| H | 56.915607 | 53.211877 | 91.000376 |
| H | 56.470039 | 51.960225 | 89.793107 |
| C | 58.618067 | 52.065611 | 90.264652 |
| H | 58.763850 | 51.229007 | 89.555154 |
| H | 59.021858 | 52.981632 | 89.799423 |
| N | 59.282655 | 51.782054 | 91.548271 |
| C | 60.571226 | 52.092561 | 91.903707 |
| O | 60.970036 | 51.897265 | 93.061993 |
| C | 61.511307 | 52.649357 | 90.821691 |
| H | 61.089576 | 53.573248 | 90.375808 |
| H | 62.441409 | 52.927097 | 91.352243 |
| C | 61.830930 | 51.633265 | 89.693786 |
| H | 60.903249 | 51.457498 | 89.109903 |
| C | 62.288210 | 50.282613 | 90.268700 |
| H | 62.538529 | 49.571950 | 89.457026 |
| H | 63.189258 | 50.407823 | 90.903082 |
| H | 61.501838 | 49.819049 | 90.894360 |
| C | 62.877653 | 52.216490 | 88.731110 |
| H | 63.836914 | 52.404433 | 89.255994 |
| H | 63.083492 | 51.516285 | 87.897505 |
| H | 62.537697 | 53.175769 | 88.294704 |
| C | 58.643450 | 56.266527 | 90.155414 |
| H | 59.068931 | 57.290797 | 90.140489 |
| H | 57.831875 | 56.250466 | 90.909024 |
| H | 59.437371 | 55.583604 | 90.517817 |
| C | 58.119935 | 55.859793 | 88.768664 |

|   |           |           |           |
|---|-----------|-----------|-----------|
| H | 57.251145 | 56.501707 | 88.509681 |
| H | 57.722107 | 54.822344 | 88.807429 |
| C | 59.151708 | 55.947869 | 87.620814 |
| H | 59.527456 | 56.996123 | 87.589822 |
| C | 60.361640 | 55.023528 | 87.846433 |
| H | 60.030220 | 53.971742 | 87.957389 |
| H | 61.051424 | 55.053945 | 86.980344 |
| H | 60.936611 | 55.301646 | 88.751405 |
| C | 58.484136 | 55.643188 | 86.267270 |
| H | 59.218625 | 55.683879 | 85.439268 |
| H | 57.667005 | 56.360688 | 86.050562 |
| H | 58.053695 | 54.622786 | 86.265768 |
| C | 60.868915 | 54.214538 | 82.008458 |
| H | 61.922583 | 54.495698 | 81.807186 |
| H | 60.321803 | 55.152717 | 82.232838 |
| H | 60.444641 | 53.784803 | 81.082045 |
| C | 60.773618 | 53.240810 | 83.150912 |
| N | 61.263133 | 53.543725 | 84.414408 |
| C | 61.020186 | 52.470430 | 85.162363 |
| H | 61.253311 | 52.360641 | 86.224882 |
| N | 60.400439 | 51.484883 | 84.446905 |
| H | 60.106281 | 50.564160 | 84.816357 |
| C | 60.228101 | 51.957088 | 83.158848 |
| H | 59.733357 | 51.352367 | 82.381975 |
| O | 55.971632 | 47.026016 | 87.432026 |
| H | 56.487422 | 47.415184 | 88.177071 |

H<sub>2</sub>O Model

|    |           |           |           |
|----|-----------|-----------|-----------|
| Ni | 57.950388 | 47.179535 | 85.011958 |
| Fe | 57.497361 | 49.434463 | 86.707041 |
| O  | 56.817593 | 47.506903 | 86.547335 |
| C  | 55.738102 | 49.920345 | 87.059730 |
| N  | 54.599671 | 50.133045 | 87.268579 |
| C  | 57.888253 | 49.074337 | 88.479405 |
| N  | 58.170046 | 48.775552 | 89.580901 |
| C  | 57.983797 | 51.070171 | 86.869920 |
| O  | 58.267574 | 52.183761 | 87.049806 |
| S  | 58.791465 | 46.546009 | 83.076375 |
| C  | 59.954946 | 47.893404 | 82.668763 |
| H  | 60.716228 | 47.930928 | 83.468680 |
| H  | 59.410816 | 48.855871 | 82.688428 |
| C  | 60.594032 | 47.640669 | 81.310369 |
| H  | 61.362395 | 48.410895 | 81.100189 |
| H  | 61.087821 | 46.650115 | 81.269661 |
| H  | 59.847243 | 47.683303 | 80.497348 |
| S  | 58.533939 | 45.213293 | 85.782507 |
| C  | 58.027614 | 45.184296 | 87.565883 |
| H  | 58.321303 | 46.141019 | 88.037654 |
| H  | 56.922509 | 45.122778 | 87.639782 |
| C  | 58.671699 | 44.019532 | 88.315733 |
| H  | 58.422869 | 44.106660 | 89.391315 |

|   |           |           |           |
|---|-----------|-----------|-----------|
| H | 58.323087 | 43.039265 | 87.939251 |
| H | 59.774199 | 44.051215 | 88.220781 |
| S | 59.590998 | 48.631473 | 85.990752 |
| C | 60.724504 | 47.899762 | 87.258805 |
| H | 60.618641 | 48.523555 | 88.165601 |
| H | 60.330335 | 46.898029 | 87.501256 |
| C | 62.197482 | 47.815237 | 86.787498 |
| H | 62.602139 | 48.816910 | 86.547662 |
| H | 62.292325 | 47.176586 | 85.889083 |
| H | 62.812984 | 47.374370 | 87.595056 |
| S | 57.192028 | 49.304126 | 84.353853 |
| C | 55.376369 | 49.241657 | 84.018172 |
| H | 54.959292 | 50.176305 | 84.436190 |
| H | 54.931792 | 48.404555 | 84.586259 |
| C | 55.016466 | 49.114833 | 82.524202 |
| H | 55.407031 | 49.981947 | 81.954589 |
| H | 53.914070 | 49.097456 | 82.433394 |
| N | 55.500526 | 47.868065 | 81.948434 |
| H | 56.497284 | 47.641705 | 82.061398 |
| C | 54.649820 | 46.876541 | 81.538301 |
| O | 53.424350 | 46.989818 | 81.508860 |
| C | 55.343215 | 45.553150 | 81.140508 |
| H | 54.638837 | 45.020244 | 80.479763 |
| H | 55.490118 | 44.947072 | 82.055933 |
| N | 56.628232 | 45.701574 | 80.480581 |
| H | 57.461540 | 45.736767 | 81.081180 |
| C | 56.703021 | 46.141252 | 79.185199 |
| O | 55.701518 | 46.295424 | 78.478661 |
| C | 58.111648 | 46.439855 | 78.681637 |
| H | 58.324332 | 47.518509 | 78.819490 |
| H | 58.156251 | 46.226338 | 77.599272 |
| H | 58.892737 | 45.858547 | 79.204054 |
| O | 51.417487 | 47.981894 | 84.503478 |
| O | 50.344493 | 46.042815 | 84.945597 |
| C | 50.403259 | 47.216085 | 84.461455 |
| C | 49.122932 | 47.780945 | 83.803824 |
| H | 49.373397 | 48.275832 | 82.846787 |
| H | 48.685887 | 48.551064 | 84.470234 |
| H | 48.375685 | 46.985233 | 83.636590 |
| H | 52.607238 | 47.696116 | 85.612277 |
| N | 53.284245 | 47.499857 | 86.415342 |
| H | 53.701534 | 48.309809 | 86.893995 |
| C | 53.256152 | 46.273996 | 86.962504 |
| N | 52.517526 | 45.323308 | 86.367678 |
| H | 51.705163 | 45.616617 | 85.720445 |
| H | 52.431137 | 44.418300 | 86.829462 |
| N | 54.010771 | 45.960620 | 88.058950 |
| H | 53.864376 | 45.027660 | 88.441958 |
| C | 54.610819 | 46.941392 | 88.968450 |
| H | 55.283970 | 46.387674 | 89.647761 |
| H | 55.277127 | 47.615976 | 88.386382 |
| C | 53.583946 | 47.778982 | 89.735851 |

|   |           |           |           |
|---|-----------|-----------|-----------|
| H | 53.014347 | 47.123276 | 90.423594 |
| H | 52.850389 | 48.180984 | 89.009294 |
| C | 54.203098 | 48.961180 | 90.495792 |
| H | 54.663405 | 48.629867 | 91.447485 |
| H | 55.022805 | 49.397430 | 89.891515 |
| C | 53.162509 | 50.053376 | 90.791324 |
| H | 53.651300 | 50.902585 | 91.313662 |
| H | 52.361387 | 49.677809 | 91.455153 |
| N | 52.507695 | 50.523305 | 89.578772 |
| H | 53.101541 | 50.719231 | 88.763274 |
| C | 51.154593 | 50.624675 | 89.464320 |
| O | 50.358465 | 50.302730 | 90.354771 |
| C | 50.633133 | 51.106191 | 88.094454 |
| H | 49.666786 | 51.598607 | 88.319504 |
| C | 50.454454 | 49.973011 | 87.059310 |
| H | 51.247984 | 49.209559 | 87.180779 |
| H | 49.480696 | 49.463969 | 87.167027 |
| C | 50.643313 | 50.689768 | 85.711793 |
| H | 50.878387 | 49.969332 | 84.907756 |
| H | 49.732520 | 51.264599 | 85.447880 |
| C | 51.800373 | 51.650019 | 86.016707 |
| H | 52.776295 | 51.126116 | 85.945561 |
| H | 51.824297 | 52.529959 | 85.349427 |
| N | 51.531488 | 52.049598 | 87.411177 |
| C | 51.873247 | 53.218800 | 88.035460 |
| O | 51.422267 | 53.500258 | 89.156184 |
| C | 52.902451 | 54.102595 | 87.336904 |
| H | 52.874146 | 55.078206 | 87.855165 |
| H | 52.635616 | 54.279080 | 86.276110 |
| C | 54.303759 | 53.473892 | 87.432890 |
| H | 54.564024 | 53.262822 | 88.488528 |
| H | 54.370346 | 52.516718 | 86.887489 |
| H | 55.076494 | 54.155718 | 87.028179 |
| H | 58.124968 | 47.247081 | 90.463650 |
| O | 58.326633 | 46.456192 | 91.032492 |
| C | 59.595418 | 46.684335 | 91.625963 |
| H | 59.969213 | 45.710022 | 91.997126 |
| H | 60.334222 | 47.047618 | 90.872827 |
| C | 59.556609 | 47.665756 | 92.808503 |
| H | 60.541891 | 47.669143 | 93.322452 |
| H | 58.807205 | 47.325117 | 93.551215 |
| N | 59.218753 | 49.011769 | 92.362322 |
| H | 59.075253 | 49.160786 | 91.354686 |
| C | 58.782769 | 49.963400 | 93.231619 |
| O | 58.684961 | 49.783020 | 94.450118 |
| C | 58.336398 | 51.285034 | 92.575574 |
| H | 58.263885 | 52.008308 | 93.411126 |
| C | 56.997513 | 51.166966 | 91.806105 |
| H | 56.130024 | 51.322167 | 92.471555 |
| H | 56.909209 | 50.159590 | 91.358532 |
| C | 57.112062 | 52.214993 | 90.682892 |
| H | 56.870264 | 53.226902 | 91.063032 |

|   |           |           |           |
|---|-----------|-----------|-----------|
| H | 56.445575 | 52.001263 | 89.826273 |
| C | 58.594837 | 52.135682 | 90.289579 |
| H | 58.751883 | 51.330734 | 89.548417 |
| H | 58.977586 | 53.077796 | 89.859706 |
| N | 59.272395 | 51.807808 | 91.553756 |
| C | 60.573825 | 52.075257 | 91.896565 |
| O | 60.985561 | 51.831994 | 93.040439 |
| C | 61.511307 | 52.649357 | 90.821691 |
| H | 61.112661 | 53.606984 | 90.427925 |
| H | 62.457724 | 52.873322 | 91.348047 |
| C | 61.786402 | 51.679470 | 89.641867 |
| H | 60.850953 | 51.567270 | 89.054627 |
| C | 62.195517 | 50.285084 | 90.147209 |
| H | 62.430542 | 49.611937 | 89.299935 |
| H | 63.095294 | 50.347049 | 90.791995 |
| H | 61.389933 | 49.814336 | 90.742277 |
| C | 62.852283 | 52.268356 | 88.702917 |
| H | 63.822261 | 52.380414 | 89.228987 |
| H | 63.018828 | 51.608984 | 87.827830 |
| H | 62.555592 | 53.265387 | 88.323767 |
| C | 58.643450 | 56.266527 | 90.155414 |
| H | 59.101378 | 57.275085 | 90.103640 |
| H | 57.845367 | 56.296504 | 90.922650 |
| H | 59.421129 | 55.566638 | 90.521948 |
| C | 58.084048 | 55.837998 | 88.788339 |
| H | 57.216037 | 56.483111 | 88.535317 |
| H | 57.678055 | 54.805110 | 88.857921 |
| C | 59.090647 | 55.891514 | 87.614799 |
| H | 59.467514 | 56.937006 | 87.545923 |
| C | 60.304592 | 54.971809 | 87.838872 |
| H | 59.973549 | 53.924686 | 87.987066 |
| H | 60.973897 | 54.978224 | 86.956191 |
| H | 60.898788 | 55.273420 | 88.723487 |
| C | 58.392635 | 55.548371 | 86.285368 |
| H | 59.111218 | 55.542593 | 85.442639 |
| H | 57.582265 | 56.269917 | 86.057535 |
| H | 57.947305 | 54.535923 | 86.332511 |
| C | 60.868915 | 54.214538 | 82.008458 |
| H | 61.919024 | 54.547631 | 81.885053 |
| H | 60.257882 | 55.125247 | 82.170380 |
| H | 60.542465 | 53.746744 | 81.061259 |
| C | 60.734218 | 53.258981 | 83.159946 |
| N | 61.096012 | 53.610899 | 84.453636 |
| C | 60.846318 | 52.541492 | 85.202662 |
| H | 60.986448 | 52.464322 | 86.283847 |
| N | 60.342203 | 51.511510 | 84.458316 |
| H | 60.072989 | 50.585663 | 84.822008 |
| C | 60.259793 | 51.949334 | 83.147787 |
| H | 59.873913 | 51.316177 | 82.351336 |
| H | 56.625989 | 46.576584 | 86.305736 |
| H | 56.248139 | 47.682163 | 87.329213 |

O<sup>2-</sup> Model

|    |           |           |           |
|----|-----------|-----------|-----------|
| Ni | 57.888928 | 47.271637 | 85.048054 |
| Fe | 57.486699 | 49.450931 | 86.719488 |
| O  | 56.971679 | 47.615964 | 86.549367 |
| C  | 55.729890 | 49.880916 | 87.059022 |
| N  | 54.584773 | 50.114550 | 87.243473 |
| C  | 57.914916 | 49.074944 | 88.469519 |
| N  | 58.225907 | 48.790625 | 89.573931 |
| C  | 57.967808 | 51.108131 | 86.863821 |
| O  | 58.247516 | 52.241818 | 87.014570 |
| S  | 58.633857 | 46.595148 | 82.993303 |
| C  | 59.460629 | 48.051069 | 82.250142 |
| H  | 59.855735 | 48.657170 | 83.088191 |
| H  | 58.712429 | 48.680039 | 81.726888 |
| C  | 60.594032 | 47.640669 | 81.310369 |
| H  | 61.074120 | 48.530494 | 80.848203 |
| H  | 61.372088 | 47.077503 | 81.862399 |
| H  | 60.231811 | 46.991199 | 80.491614 |
| S  | 58.428503 | 45.219750 | 85.774544 |
| C  | 57.915419 | 45.109308 | 87.533382 |
| H  | 58.068171 | 46.106133 | 87.987167 |
| H  | 56.823664 | 44.931533 | 87.578392 |
| C  | 58.671699 | 44.019532 | 88.315733 |
| H  | 58.374038 | 44.056191 | 89.383564 |
| H  | 58.469545 | 43.003223 | 87.919568 |
| H  | 59.765967 | 44.190153 | 88.265526 |
| S  | 59.664271 | 48.681680 | 85.878977 |
| C  | 60.689651 | 47.775736 | 87.109508 |
| H  | 60.474772 | 48.204737 | 88.106052 |
| H  | 60.317598 | 46.733455 | 87.100743 |
| C  | 62.197482 | 47.815237 | 86.787498 |
| H  | 62.582083 | 48.854864 | 86.783772 |
| H  | 62.401141 | 47.373907 | 85.792126 |
| H  | 62.765588 | 47.239006 | 87.546992 |
| S  | 57.144400 | 49.362948 | 84.354238 |
| C  | 55.340602 | 49.269474 | 84.019777 |
| H  | 54.878357 | 50.193310 | 84.415507 |
| H  | 54.928434 | 48.420772 | 84.590953 |
| C  | 55.016466 | 49.114833 | 82.524202 |
| H  | 55.440656 | 49.964959 | 81.948317 |
| H  | 53.918469 | 49.104528 | 82.385737 |
| N  | 55.513867 | 47.848923 | 82.004724 |
| H  | 56.466307 | 47.555483 | 82.294007 |
| C  | 54.679804 | 46.907819 | 81.477462 |
| O  | 53.474808 | 47.078255 | 81.262322 |
| C  | 55.374604 | 45.564378 | 81.161681 |
| H  | 54.689002 | 44.994162 | 80.512635 |
| H  | 55.527730 | 45.007040 | 82.106753 |
| N  | 56.661698 | 45.716687 | 80.505728 |
| H  | 57.467998 | 45.903455 | 81.140234 |
| C  | 56.725753 | 46.043291 | 79.181952 |

|   |           |           |           |
|---|-----------|-----------|-----------|
| O | 55.737426 | 46.034976 | 78.433512 |
| C | 58.111648 | 46.439855 | 78.681637 |
| H | 58.282967 | 47.516252 | 78.881042 |
| H | 58.162043 | 46.277090 | 77.590803 |
| H | 58.916484 | 45.870950 | 79.182321 |
| O | 51.456022 | 48.060808 | 84.300753 |
| O | 50.543977 | 46.017525 | 84.630313 |
| C | 50.492806 | 47.233760 | 84.271986 |
| C | 49.122932 | 47.780945 | 83.803824 |
| H | 49.250082 | 48.439940 | 82.924279 |
| H | 48.682123 | 48.393887 | 84.615711 |
| H | 48.423515 | 46.959125 | 83.563583 |
| H | 52.656671 | 47.770591 | 85.456698 |
| N | 53.297793 | 47.566670 | 86.274211 |
| H | 53.864677 | 48.335650 | 86.669656 |
| C | 53.483236 | 46.292285 | 86.629884 |
| N | 52.885757 | 45.314363 | 85.900963 |
| H | 52.053346 | 45.595394 | 85.299674 |
| H | 52.801252 | 44.402455 | 86.349541 |
| N | 54.229839 | 45.952811 | 87.709117 |
| H | 54.465528 | 44.968544 | 87.810803 |
| C | 54.851971 | 46.913958 | 88.626978 |
| H | 55.535612 | 46.342666 | 89.280211 |
| H | 55.506806 | 47.592739 | 88.045223 |
| C | 53.799744 | 47.677805 | 89.445495 |
| H | 53.262487 | 46.976803 | 90.120061 |
| H | 53.040835 | 48.072556 | 88.742900 |
| C | 54.368343 | 48.864190 | 90.236600 |
| H | 54.872647 | 48.522415 | 91.163208 |
| H | 55.145595 | 49.366468 | 89.629931 |
| C | 53.278041 | 49.883847 | 90.609590 |
| H | 53.733863 | 50.725077 | 91.176713 |
| H | 52.507490 | 49.434786 | 91.265795 |
| N | 52.577077 | 50.399790 | 89.436689 |
| H | 53.142963 | 50.537318 | 88.578960 |
| C | 51.230090 | 50.588520 | 89.423526 |
| O | 50.481627 | 50.326677 | 90.378120 |
| C | 50.633133 | 51.106191 | 88.094454 |
| H | 49.683805 | 51.601976 | 88.377139 |
| C | 50.410861 | 49.985706 | 87.048614 |
| H | 51.173124 | 49.191099 | 87.172660 |
| H | 49.416302 | 49.516341 | 87.154325 |
| C | 50.631400 | 50.689678 | 85.698395 |
| H | 50.872316 | 49.960595 | 84.901799 |
| H | 49.733011 | 51.276422 | 85.414160 |
| C | 51.799720 | 51.631601 | 86.012116 |
| H | 52.768716 | 51.090925 | 85.972326 |
| H | 51.851482 | 52.503411 | 85.335392 |
| N | 51.511457 | 52.054386 | 87.395356 |
| C | 51.869911 | 53.215998 | 88.017255 |
| O | 51.431452 | 53.503779 | 89.144098 |
| C | 52.899103 | 54.090756 | 87.308457 |



|   |           |           |           |
|---|-----------|-----------|-----------|
| H | 52.859528 | 55.079055 | 87.803273 |
| H | 52.639640 | 54.239558 | 86.241309 |
| C | 54.303759 | 53.473892 | 87.432890 |
| H | 54.568042 | 53.324043 | 88.497589 |
| H | 54.378240 | 52.483083 | 86.950475 |
| H | 55.073207 | 54.134957 | 86.988599 |
| H | 58.067231 | 47.318613 | 90.468566 |
| O | 58.209792 | 46.533792 | 91.079886 |
| C | 59.503250 | 46.680396 | 91.627882 |
| H | 59.838899 | 45.686865 | 91.991329 |
| H | 60.234623 | 47.006474 | 90.851368 |
| C | 59.556609 | 47.665756 | 92.808503 |
| H | 60.570460 | 47.648997 | 93.266695 |
| H | 58.839839 | 47.355204 | 93.595576 |
| N | 59.222796 | 49.013241 | 92.362671 |
| H | 59.060820 | 49.148988 | 91.348314 |
| C | 58.790068 | 49.965061 | 93.230971 |
| O | 58.703788 | 49.791851 | 94.454623 |
| C | 58.336398 | 51.285034 | 92.575574 |
| H | 58.253623 | 52.009112 | 93.409926 |
| C | 57.006203 | 51.153446 | 91.788253 |
| H | 56.129635 | 51.318311 | 92.440235 |
| H | 56.925936 | 50.141156 | 91.349423 |
| C | 57.133269 | 52.182358 | 90.649209 |
| H | 56.891843 | 53.202308 | 91.011297 |
| H | 56.477844 | 51.953080 | 89.788954 |
| C | 58.617411 | 52.089647 | 90.272158 |
| H | 58.776483 | 51.256677 | 89.563778 |
| H | 59.008587 | 53.015312 | 89.816038 |
| N | 59.279564 | 51.808830 | 91.559447 |
| C | 60.570607 | 52.099413 | 91.907692 |
| O | 60.978310 | 51.900012 | 93.064518 |
| C | 61.511307 | 52.649357 | 90.821691 |
| H | 61.103960 | 53.589245 | 90.395177 |
| H | 62.452518 | 52.898989 | 91.347508 |
| C | 61.798683 | 51.647678 | 89.672064 |
| H | 60.869767 | 51.512701 | 89.082032 |
| C | 62.206716 | 50.267166 | 90.211869 |
| H | 62.416687 | 49.569215 | 89.378375 |
| H | 63.117250 | 50.340332 | 90.842140 |
| H | 61.403522 | 49.819563 | 90.826899 |
| C | 62.868085 | 52.218116 | 88.726539 |
| H | 63.834332 | 52.351760 | 89.256477 |
| H | 63.043509 | 51.535330 | 87.871900 |
| H | 62.566331 | 53.202491 | 88.318182 |
| C | 58.643450 | 56.266527 | 90.155414 |
| H | 59.085459 | 57.284248 | 90.142153 |
| H | 57.832902 | 56.261101 | 90.910587 |
| H | 59.425933 | 55.569250 | 90.515076 |
| C | 58.112315 | 55.869262 | 88.768949 |
| H | 57.246601 | 56.517789 | 88.514698 |
| H | 57.710476 | 54.834101 | 88.803675 |

|   |           |           |           |
|---|-----------|-----------|-----------|
| C | 59.141783 | 55.955016 | 87.619251 |
| H | 59.513406 | 57.005244 | 87.579532 |
| C | 60.352055 | 55.033130 | 87.849286 |
| H | 60.015315 | 53.984079 | 87.961258 |
| H | 61.041002 | 55.061110 | 86.982640 |
| H | 60.926446 | 55.312152 | 88.754605 |
| C | 58.473614 | 55.629779 | 86.271208 |
| H | 59.205266 | 55.673478 | 85.440803 |
| H | 57.643390 | 56.332211 | 86.052118 |
| H | 58.064616 | 54.601254 | 86.284388 |
| C | 60.868915 | 54.214538 | 82.008458 |
| H | 61.914151 | 54.541742 | 81.831731 |
| H | 60.269337 | 55.131631 | 82.182620 |
| H | 60.497919 | 53.736131 | 81.082591 |
| C | 60.780874 | 53.272037 | 83.178819 |
| N | 61.220809 | 53.635608 | 84.444237 |
| C | 60.994286 | 52.575269 | 85.219498 |
| H | 61.194396 | 52.506662 | 86.291533 |
| N | 60.436238 | 51.545780 | 84.522141 |
| H | 60.176347 | 50.616849 | 84.920492 |
| C | 60.285648 | 51.967816 | 83.214750 |
| H | 59.838186 | 51.327568 | 82.456962 |

OHa model

|    |           |           |           |
|----|-----------|-----------|-----------|
| Ni | 57.947754 | 47.233571 | 85.027479 |
| Fe | 57.505675 | 49.497536 | 86.692409 |
| O  | 56.785996 | 47.622614 | 86.470289 |
| C  | 55.742277 | 49.967910 | 87.053206 |
| N  | 54.603514 | 50.170961 | 87.277963 |
| C  | 57.890812 | 49.119964 | 88.458619 |
| N  | 58.159841 | 48.783233 | 89.555144 |
| C  | 57.988874 | 51.136326 | 86.849546 |
| O  | 58.271377 | 52.254783 | 87.031727 |
| S  | 58.764551 | 46.581318 | 83.083646 |
| C  | 59.965964 | 47.892975 | 82.673813 |
| H  | 60.733298 | 47.903575 | 83.469045 |
| H  | 59.451482 | 48.872150 | 82.710463 |
| C  | 60.594032 | 47.640669 | 81.310369 |
| H  | 61.373209 | 48.399694 | 81.092795 |
| H  | 61.071618 | 46.642279 | 81.265337 |
| H  | 59.840430 | 47.691627 | 80.503536 |
| S  | 58.612556 | 45.288664 | 85.822537 |
| C  | 58.106619 | 45.243709 | 87.593728 |
| H  | 58.485969 | 46.142825 | 88.119707 |
| H  | 57.001692 | 45.248944 | 87.663706 |
| C  | 58.671699 | 44.019532 | 88.315733 |
| H  | 58.410029 | 44.076855 | 89.389780 |
| H  | 58.273792 | 43.076134 | 87.894658 |
| H  | 59.775651 | 43.991543 | 88.236934 |

|   |           |           |           |
|---|-----------|-----------|-----------|
| S | 59.604654 | 48.683161 | 85.972338 |
| C | 60.725448 | 47.944366 | 87.246142 |
| H | 60.634331 | 48.580579 | 88.145130 |
| H | 60.311747 | 46.952848 | 87.499784 |
| C | 62.197482 | 47.815237 | 86.787498 |
| H | 62.630481 | 48.803234 | 86.539065 |
| H | 62.278362 | 47.167186 | 85.894409 |
| H | 62.799621 | 47.363399 | 87.600021 |
| S | 57.189342 | 49.338196 | 84.346085 |
| C | 55.375073 | 49.236971 | 84.018109 |
| H | 54.931511 | 50.155808 | 84.442455 |
| H | 54.974109 | 48.380788 | 84.586948 |
| C | 55.016466 | 49.114833 | 82.524202 |
| H | 55.389724 | 49.992952 | 81.959525 |
| H | 53.915867 | 49.064893 | 82.428894 |
| N | 55.538426 | 47.882593 | 81.953762 |
| H | 56.538980 | 47.676233 | 82.092616 |
| C | 54.714647 | 46.855537 | 81.589495 |
| O | 53.484887 | 46.929594 | 81.559711 |
| C | 55.448922 | 45.545204 | 81.238140 |
| H | 54.757744 | 44.957687 | 80.610598 |
| H | 55.636260 | 44.984811 | 82.174690 |
| N | 56.711341 | 45.720569 | 80.547228 |
| H | 57.556848 | 45.826983 | 81.128741 |
| C | 56.734667 | 46.085425 | 79.229113 |
| O | 55.710159 | 46.160568 | 78.540370 |
| C | 58.111648 | 46.439855 | 78.681637 |
| H | 58.264222 | 47.534720 | 78.757565 |
| H | 58.153237 | 46.168897 | 77.611918 |
| H | 58.932216 | 45.936105 | 79.222185 |
| O | 51.434420 | 48.022931 | 84.415077 |
| O | 50.412044 | 46.063128 | 84.890809 |
| C | 50.435354 | 47.238152 | 84.410207 |
| C | 49.122932 | 47.780945 | 83.803824 |
| H | 49.328935 | 48.304461 | 82.851248 |
| H | 48.679935 | 48.522035 | 84.498515 |
| H | 48.393081 | 46.968477 | 83.638449 |
| H | 52.619046 | 47.753961 | 85.544464 |
| N | 53.281844 | 47.568586 | 86.358020 |
| H | 53.845821 | 48.343799 | 86.734879 |
| C | 53.356166 | 46.327848 | 86.846684 |
| N | 52.640707 | 45.349076 | 86.255722 |
| H | 51.811846 | 45.623503 | 85.632454 |
| H | 52.570207 | 44.454755 | 86.738870 |
| N | 54.153107 | 46.021988 | 87.909460 |
| H | 54.043641 | 45.081771 | 88.285348 |
| C | 54.728575 | 47.026831 | 88.803302 |
| H | 55.479882 | 46.514922 | 89.432187 |
| H | 55.285351 | 47.759281 | 88.190700 |
| C | 53.691302 | 47.754863 | 89.667487 |
| H | 53.220297 | 47.048774 | 90.382350 |
| H | 52.882418 | 48.113867 | 89.001198 |

|   |           |           |           |
|---|-----------|-----------|-----------|
| C | 54.282486 | 48.967521 | 90.399628 |
| H | 54.781095 | 48.662421 | 91.341441 |
| H | 55.068138 | 49.426948 | 89.766425 |
| C | 53.215655 | 50.026436 | 90.715554 |
| H | 53.685835 | 50.884264 | 91.242153 |
| H | 52.428420 | 49.625840 | 91.381393 |
| N | 52.537054 | 50.491429 | 89.515943 |
| H | 53.115323 | 50.678975 | 88.683541 |
| C | 51.184049 | 50.607401 | 89.442463 |
| O | 50.409032 | 50.296792 | 90.357495 |
| C | 50.633133 | 51.106191 | 88.094454 |
| H | 49.673639 | 51.601824 | 88.342074 |
| C | 50.434448 | 49.985447 | 87.050114 |
| H | 51.211288 | 49.205777 | 87.170063 |
| H | 49.449848 | 49.496955 | 87.154388 |
| C | 50.640959 | 50.702193 | 85.705323 |
| H | 50.886974 | 49.984112 | 84.901112 |
| H | 49.732776 | 51.276481 | 85.429922 |
| C | 51.795060 | 51.662205 | 86.017250 |
| H | 52.772989 | 51.143923 | 85.941895 |
| H | 51.814002 | 52.548416 | 85.357838 |
| N | 51.529042 | 52.051562 | 87.413504 |
| C | 51.869520 | 53.218088 | 88.039818 |
| O | 51.420021 | 53.496096 | 89.162936 |
| C | 52.901092 | 54.102312 | 87.345391 |
| H | 52.873276 | 55.075287 | 87.868931 |
| H | 52.630575 | 54.283267 | 86.286227 |
| C | 54.303759 | 53.473892 | 87.432890 |
| H | 54.560832 | 53.240468 | 88.483540 |
| H | 54.368378 | 52.525678 | 86.871938 |
| H | 55.076146 | 54.163832 | 87.042144 |
| H | 58.107562 | 47.312522 | 90.481720 |
| O | 58.294960 | 46.501072 | 91.033677 |
| C | 59.566843 | 46.688073 | 91.625791 |
| H | 59.910038 | 45.701743 | 91.995043 |
| H | 60.315478 | 47.029385 | 90.873113 |
| C | 59.556609 | 47.665756 | 92.808503 |
| H | 60.550593 | 47.658376 | 93.306232 |
| H | 58.815144 | 47.335350 | 93.563378 |
| N | 59.223595 | 49.013478 | 92.364563 |
| H | 59.097631 | 49.170165 | 91.354312 |
| C | 58.783657 | 49.965288 | 93.231394 |
| O | 58.680087 | 49.783941 | 94.450211 |
| C | 58.336398 | 51.285034 | 92.575574 |
| H | 58.258524 | 52.009888 | 93.409488 |
| C | 57.003026 | 51.160319 | 91.800134 |
| H | 56.132090 | 51.311809 | 92.461961 |
| H | 56.922580 | 50.153635 | 91.348425 |
| C | 57.117509 | 52.212024 | 90.682606 |
| H | 56.870524 | 53.220596 | 91.069159 |
| H | 56.454103 | 52.000852 | 89.823963 |
| C | 58.600078 | 52.140704 | 90.291276 |

|   |           |           |           |
|---|-----------|-----------|-----------|
| H | 58.761025 | 51.344977 | 89.541407 |
| H | 58.979485 | 53.090571 | 89.875624 |
| N | 59.275721 | 51.803602 | 91.554566 |
| C | 60.574523 | 52.075893 | 91.897754 |
| O | 60.987709 | 51.834644 | 93.042447 |
| C | 61.511307 | 52.649357 | 90.821691 |
| H | 61.107772 | 53.602417 | 90.421350 |
| H | 62.453224 | 52.885235 | 91.351605 |
| C | 61.804892 | 51.672266 | 89.654494 |
| H | 60.874382 | 51.541947 | 89.063565 |
| C | 62.232405 | 50.292380 | 90.178431 |
| H | 62.474301 | 49.610724 | 89.341323 |
| H | 63.131501 | 50.376177 | 90.822157 |
| H | 61.434300 | 49.819968 | 90.779694 |
| C | 62.873242 | 52.261835 | 88.720281 |
| H | 63.839389 | 52.376623 | 89.253275 |
| H | 63.047415 | 51.599152 | 87.849589 |
| H | 62.579325 | 53.258507 | 88.337517 |
| C | 58.643450 | 56.266527 | 90.155414 |
| H | 59.104377 | 57.275093 | 90.138408 |
| H | 57.823270 | 56.283786 | 90.899264 |
| H | 59.408364 | 55.557916 | 90.532060 |
| C | 58.122762 | 55.868386 | 88.766237 |
| H | 57.266175 | 56.523650 | 88.501367 |
| H | 57.710439 | 54.837380 | 88.802573 |
| C | 59.163431 | 55.939259 | 87.626930 |
| H | 59.552033 | 56.982575 | 87.595432 |
| C | 60.361133 | 55.003645 | 87.867808 |
| H | 60.017413 | 53.956510 | 87.983744 |
| H | 61.058783 | 55.022417 | 87.007930 |
| H | 60.930462 | 55.282176 | 88.776222 |
| C | 58.502418 | 55.639572 | 86.270750 |
| H | 59.248097 | 55.645107 | 85.452613 |
| H | 57.710489 | 56.379522 | 86.037286 |
| H | 58.040908 | 54.633374 | 86.276444 |
| C | 60.868915 | 54.214538 | 82.008458 |
| H | 61.915697 | 54.547535 | 81.857341 |
| H | 60.261305 | 55.126898 | 82.175058 |
| H | 60.521393 | 53.739081 | 81.072753 |
| C | 60.760035 | 53.269117 | 83.167753 |
| N | 61.158297 | 53.631535 | 84.447002 |
| C | 60.919662 | 52.570515 | 85.214090 |
| H | 61.086818 | 52.505279 | 86.291539 |
| N | 60.388080 | 51.538044 | 84.494153 |
| H | 60.118629 | 50.613419 | 84.873324 |
| C | 60.274911 | 51.962752 | 83.182517 |
| H | 59.858537 | 51.321728 | 82.402462 |
| H | 57.045639 | 47.101062 | 87.247432 |

OHb model

|    |           |           |           |
|----|-----------|-----------|-----------|
| Ni | 57.939894 | 47.172036 | 85.021392 |
| Fe | 57.488060 | 49.421605 | 86.718328 |
| O  | 56.837999 | 47.505907 | 86.552488 |
| C  | 55.727376 | 49.893868 | 87.079864 |
| N  | 54.587080 | 50.105503 | 87.293544 |
| C  | 57.882650 | 49.058369 | 88.488301 |
| N  | 58.169266 | 48.763026 | 89.591285 |
| C  | 57.972536 | 51.059753 | 86.880529 |
| O  | 58.255657 | 52.179421 | 87.057527 |
| S  | 58.771564 | 46.541054 | 83.075432 |
| C  | 59.941429 | 47.884367 | 82.664717 |
| H  | 60.698275 | 47.924102 | 83.469484 |
| H  | 59.398698 | 48.849074 | 82.685277 |
| C  | 60.594032 | 47.640669 | 81.310369 |
| H  | 61.360024 | 48.415895 | 81.101173 |
| H  | 61.093254 | 46.652305 | 81.272888 |
| H  | 59.851229 | 47.675803 | 80.492858 |
| S  | 58.556538 | 45.214945 | 85.787840 |
| C  | 57.949625 | 45.122720 | 87.526286 |
| H  | 58.109190 | 46.103567 | 88.007919 |
| H  | 56.855706 | 44.965295 | 87.520231 |
| C  | 58.671699 | 44.019532 | 88.315733 |
| H  | 58.347988 | 44.066381 | 89.374439 |
| H  | 58.456530 | 43.009375 | 87.914509 |
| H  | 59.769776 | 44.167580 | 88.293666 |
| S  | 59.584027 | 48.630707 | 85.987856 |
| C  | 60.721088 | 47.895000 | 87.250557 |
| H  | 60.613092 | 48.512158 | 88.161631 |
| H  | 60.328487 | 46.890558 | 87.486269 |
| C  | 62.197482 | 47.815237 | 86.787498 |
| H  | 62.601531 | 48.819782 | 86.556091 |
| H  | 62.296033 | 47.184418 | 85.883520 |
| H  | 62.812828 | 47.368425 | 87.593355 |
| S  | 57.178611 | 49.298095 | 84.363766 |
| C  | 55.362781 | 49.252206 | 84.019120 |
| H  | 54.943138 | 50.189150 | 84.429047 |
| H  | 54.906116 | 48.418529 | 84.582448 |
| C  | 55.016466 | 49.114833 | 82.524202 |
| H  | 55.405612 | 49.982694 | 81.953742 |
| H  | 53.916134 | 49.077680 | 82.416104 |
| N  | 55.537446 | 47.872226 | 81.974437 |
| H  | 56.538448 | 47.671985 | 82.118385 |
| C  | 54.720344 | 46.839546 | 81.607107 |
| O  | 53.490094 | 46.904893 | 81.571486 |
| C  | 55.466317 | 45.532611 | 81.258074 |
| H  | 54.777256 | 44.935559 | 80.636797 |
| H  | 55.663286 | 44.979435 | 82.197159 |
| N  | 56.725195 | 45.718128 | 80.560933 |
| H  | 57.568151 | 45.846314 | 81.142237 |
| C  | 56.738979 | 46.085241 | 79.242766 |
| O  | 55.713504 | 46.130096 | 78.552772 |
| C  | 58.111648 | 46.439855 | 78.681637 |

|   |           |           |           |
|---|-----------|-----------|-----------|
| H | 58.258233 | 47.535925 | 78.749912 |
| H | 58.142861 | 46.163654 | 77.612695 |
| H | 58.940906 | 45.942750 | 79.216183 |
| O | 51.425804 | 47.996797 | 84.476054 |
| O | 50.375060 | 46.046211 | 84.920341 |
| C | 50.418241 | 47.223119 | 84.443273 |
| C | 49.122932 | 47.780945 | 83.803824 |
| H | 49.357571 | 48.285993 | 82.847941 |
| H | 48.685565 | 48.541373 | 84.481239 |
| H | 48.381578 | 46.978920 | 83.638381 |
| H | 52.656240 | 47.709496 | 85.576362 |
| N | 53.345514 | 47.513681 | 86.367207 |
| H | 53.765666 | 48.325768 | 86.846515 |
| C | 53.327211 | 46.283460 | 86.910754 |
| N | 52.580724 | 45.332133 | 86.317697 |
| H | 51.760653 | 45.622060 | 85.682809 |
| H | 52.504422 | 44.425617 | 86.776900 |
| N | 54.084533 | 45.969327 | 87.997226 |
| H | 53.935643 | 45.037836 | 88.381524 |
| C | 54.714270 | 46.950754 | 88.889287 |
| H | 55.387105 | 46.390032 | 89.562794 |
| H | 55.383290 | 47.605374 | 88.301367 |
| C | 53.686220 | 47.780908 | 89.672163 |
| H | 53.131160 | 47.130283 | 90.379897 |
| H | 52.935547 | 48.164772 | 88.953019 |
| C | 54.297147 | 48.985277 | 90.401478 |
| H | 54.791122 | 48.675436 | 91.344493 |
| H | 55.089213 | 49.431660 | 89.768429 |
| C | 53.241864 | 50.059483 | 90.718918 |
| H | 53.729038 | 50.920216 | 91.224845 |
| H | 52.464486 | 49.672705 | 91.404583 |
| N | 52.547214 | 50.517773 | 89.523381 |
| H | 53.119489 | 50.703606 | 88.687100 |
| C | 51.191259 | 50.615973 | 89.447719 |
| O | 50.417532 | 50.302160 | 90.362399 |
| C | 50.633133 | 51.106191 | 88.094454 |
| H | 49.669132 | 51.593697 | 88.341031 |
| C | 50.446780 | 49.977912 | 87.054156 |
| H | 51.241930 | 49.215260 | 87.167254 |
| H | 49.474078 | 49.467347 | 87.166380 |
| C | 50.629905 | 50.697255 | 85.706941 |
| H | 50.869340 | 49.980382 | 84.900248 |
| H | 49.715243 | 51.268095 | 85.445580 |
| C | 51.784207 | 51.660982 | 86.009556 |
| H | 52.762372 | 51.141910 | 85.933614 |
| H | 51.800882 | 52.542930 | 85.344229 |
| N | 51.520433 | 52.056993 | 87.405638 |
| C | 51.868176 | 53.223947 | 88.029976 |
| O | 51.417538 | 53.509870 | 89.150531 |
| C | 52.901633 | 54.103333 | 87.330134 |
| H | 52.872782 | 55.081331 | 87.844625 |
| H | 52.637595 | 54.275788 | 86.267748 |

|   |           |           |           |
|---|-----------|-----------|-----------|
| C | 54.303759 | 53.473892 | 87.432890 |
| H | 54.562654 | 53.271708 | 88.490215 |
| H | 54.368093 | 52.510091 | 86.898426 |
| H | 55.078006 | 54.150381 | 87.021850 |
| H | 58.108139 | 47.251813 | 90.475638 |
| O | 58.306019 | 46.459860 | 91.050706 |
| C | 59.579507 | 46.679984 | 91.629450 |
| H | 59.950736 | 45.704376 | 92.002211 |
| H | 60.313438 | 47.036152 | 90.868240 |
| C | 59.556609 | 47.665756 | 92.808503 |
| H | 60.547695 | 47.668909 | 93.312655 |
| H | 58.813897 | 47.330065 | 93.560515 |
| N | 59.217523 | 49.010362 | 92.360761 |
| H | 59.070120 | 49.153846 | 91.349967 |
| C | 58.784947 | 49.962938 | 93.229983 |
| O | 58.691340 | 49.784670 | 94.450522 |
| C | 58.336398 | 51.285034 | 92.575574 |
| H | 58.260456 | 52.008039 | 93.411606 |
| C | 57.000365 | 51.160629 | 91.801044 |
| H | 56.129301 | 51.311291 | 92.463388 |
| H | 56.919233 | 50.153876 | 91.349530 |
| C | 57.114041 | 52.209698 | 90.679346 |
| H | 56.868879 | 53.221234 | 91.060322 |
| H | 56.450840 | 51.993286 | 89.821205 |
| C | 58.596892 | 52.132491 | 90.288166 |
| H | 58.754843 | 51.326547 | 89.548770 |
| H | 58.978856 | 53.075422 | 89.859185 |
| N | 59.273405 | 51.809204 | 91.555485 |
| C | 60.573620 | 52.077376 | 91.898264 |
| O | 60.985503 | 51.843247 | 93.045226 |
| C | 61.511307 | 52.649357 | 90.821691 |
| H | 61.112264 | 53.606888 | 90.427150 |
| H | 62.458166 | 52.873950 | 91.347729 |
| C | 61.785670 | 51.677178 | 89.643772 |
| H | 60.849849 | 51.562092 | 89.058780 |
| C | 62.196784 | 50.284854 | 90.151774 |
| H | 62.427309 | 49.609472 | 89.305558 |
| H | 63.099123 | 50.348910 | 90.793772 |
| H | 61.392598 | 49.815937 | 90.749526 |
| C | 62.850670 | 52.264591 | 88.702779 |
| H | 63.821800 | 52.376686 | 89.227715 |
| H | 63.015711 | 51.603872 | 87.828363 |
| H | 62.554047 | 53.261568 | 88.322883 |
| C | 58.643450 | 56.266527 | 90.155414 |
| H | 59.101660 | 57.275317 | 90.103525 |
| H | 57.846401 | 56.296311 | 90.923898 |
| H | 59.421111 | 55.566282 | 90.520932 |
| C | 58.081586 | 55.838744 | 88.789703 |
| H | 57.213468 | 56.484640 | 88.538136 |
| H | 57.675714 | 54.806221 | 88.858335 |
| C | 59.086604 | 55.892666 | 87.616105 |
| H | 59.464129 | 56.938533 | 87.547926 |



|   |           |           |           |
|---|-----------|-----------|-----------|
| C | 60.300341 | 54.971609 | 87.838777 |
| H | 59.968642 | 53.924808 | 87.988642 |
| H | 60.968728 | 54.976911 | 86.955322 |
| H | 60.896314 | 55.273589 | 88.722479 |
| C | 58.385069 | 55.551641 | 86.288327 |
| H | 59.103178 | 55.545015 | 85.445352 |
| H | 57.576135 | 56.275785 | 86.062044 |
| H | 57.936813 | 54.540450 | 86.336363 |
| C | 60.868915 | 54.214538 | 82.008458 |
| H | 61.920116 | 54.546436 | 81.887413 |
| H | 60.258940 | 55.126474 | 82.169831 |
| H | 60.543776 | 53.748689 | 81.059661 |
| C | 60.729523 | 53.256148 | 83.158845 |
| N | 61.091075 | 53.606780 | 84.452213 |
| C | 60.839086 | 52.535739 | 85.200399 |
| H | 60.980108 | 52.457745 | 86.281351 |
| N | 60.333572 | 51.507136 | 84.456801 |
| H | 60.062251 | 50.577621 | 84.822709 |
| C | 60.252413 | 51.946220 | 83.147522 |
| H | 59.864216 | 51.310449 | 82.348784 |
| H | 55.920850 | 47.533287 | 86.217734 |

## Volbeda Model

|   |           |            |           |
|---|-----------|------------|-----------|
| C | 5.770760  | 1.240605   | 6.994453  |
| C | 7.142542  | 1.074841   | 7.648224  |
| S | 7.080053  | 1.132365   | 9.482004  |
| C | 10.538000 | 3.337000   | 8.302000  |
| C | 10.904095 | 3.132288   | 9.761514  |
| O | 11.822115 | 3.731894   | 10.321787 |
| N | 10.193631 | 2.103504   | 10.369641 |
| C | 10.681071 | 1.422752   | 11.477061 |
| C | 11.019370 | -0.007353  | 11.365654 |
| O | 11.809159 | -0.538859  | 12.169512 |
| N | 10.548796 | -0.632118  | 10.234243 |
| C | 11.017000 | -1.936000  | 9.829000  |
| C | 9.964997  | -3.053606  | 10.026783 |
| S | 8.669028  | -2.932470  | 8.743108  |
| O | 8.266232  | -1.399793  | 8.835325  |
| C | 8.574000  | -3.088000  | 2.447000  |
| C | 7.349149  | -3.316763  | 3.285431  |
| N | 6.295502  | -4.124147  | 2.869405  |
| C | 6.941542  | -2.841635  | 4.532587  |
| C | 5.330731  | -4.099385  | 3.849938  |
| N | 5.692533  | -3.331379  | 4.864803  |
| C | 11.030898 | -8.624023  | 9.168137  |
| C | 11.096336 | -9.025584  | 10.637721 |
| O | 10.946633 | -10.206921 | 10.991923 |
| C | 9.578000  | -8.262000  | 8.803000  |
| N | 11.225390 | -8.024324  | 11.558562 |
| C | 11.093000 | -8.350000  | 12.983000 |
| C | 9.718953  | -8.946369  | 13.366644 |
| O | 9.631760  | -9.763786  | 14.295397 |
| C | 11.298481 | -6.980713  | 13.689320 |
| C | 12.059606 | -6.110652  | 12.673045 |
| C | 11.521443 | -6.598808  | 11.319052 |
| N | 8.655035  | -8.429765  | 12.697188 |
| C | 7.274636  | -8.706631  | 13.081107 |
| C | 6.411181  | -7.431472  | 13.084797 |
| C | 6.971879  | -6.329468  | 13.994630 |
| C | 6.452216  | -4.921467  | 13.660460 |
| N | 7.139989  | -3.879293  | 14.415175 |
| C | 8.441303  | -3.473543  | 14.129070 |
| N | 9.265842  | -3.988114  | 13.266020 |
| N | 8.839227  | -2.389137  | 14.915923 |
| C | 5.589000  | -10.614000 | 5.464000  |
| C | 6.708580  | -9.561790  | 5.509133  |
| C | 6.702422  | -8.550504  | 4.340353  |
| C | 5.414699  | -7.710040  | 4.295717  |
| C | 7.934517  | -7.630591  | 4.411876  |
| C | 2.053000  | -7.534000  | 6.431000  |
| C | 1.889252  | -8.235852  | 7.763970  |
| O | 0.783623  | -8.686889  | 8.108591  |
| C | 1.370677  | -6.145964  | 6.416003  |

|    |           |           |           |
|----|-----------|-----------|-----------|
| C  | 2.084829  | -5.163216 | 7.354844  |
| C  | 1.313402  | -5.596201 | 4.982139  |
| N  | 2.976476  | -8.336070 | 8.579226  |
| C  | 2.814000  | -9.018000 | 9.866000  |
| C  | 1.708146  | -8.426107 | 10.755073 |
| O  | 0.922846  | -9.153450 | 11.375188 |
| C  | 4.217137  | -8.896618 | 10.517857 |
| C  | 5.178464  | -8.748987 | 9.325195  |
| C  | 4.366912  | -7.913240 | 8.324279  |
| N  | 1.722039  | -7.065542 | 10.836233 |
| C  | 0.832000  | -6.358000 | 11.729000 |
| C  | 1.599847  | -5.523578 | 12.768075 |
| S  | 2.689178  | -6.499287 | 13.870923 |
| C  | 6.489000  | -5.295000 | 18.099000 |
| C  | 6.455668  | -3.892842 | 17.519772 |
| O  | 5.341033  | -3.565738 | 16.806869 |
| O  | 7.343540  | -3.070416 | 17.645111 |
| C  | 3.222000  | -0.903000 | 13.249000 |
| C  | 4.419588  | -1.499386 | 12.471928 |
| S  | 5.128167  | -0.221594 | 11.354759 |
| C  | 2.947000  | -1.547000 | 7.924000  |
| C  | 3.833619  | -2.425594 | 8.798319  |
| S  | 5.600502  | -2.221873 | 8.391162  |
| Fe | 6.733144  | -3.942337 | 9.513366  |
| C  | 5.144432  | -4.750870 | 10.155395 |
| N  | 4.166154  | -5.305897 | 10.502189 |
| C  | 7.724184  | -5.215239 | 10.450365 |
| N  | 8.356019  | -6.054968 | 10.980156 |
| C  | 6.688475  | -5.013160 | 8.110731  |
| O  | 6.659003  | -5.718150 | 7.186926  |
| Ni | 6.713030  | -1.017827 | 10.079814 |
| O  | 6.889655  | -2.653415 | 10.841380 |
| H  | 5.853856  | 1.210284  | 5.887103  |
| H  | 5.298035  | 2.200516  | 7.282660  |
| H  | 5.103184  | 0.416577  | 7.305819  |
| H  | 7.831754  | 1.879741  | 7.320696  |
| H  | 7.601708  | 0.106450  | 7.377588  |
| H  | 10.931507 | 4.306585  | 7.951165  |
| H  | 9.444535  | 3.298032  | 8.134841  |
| H  | 10.996388 | 2.527116  | 7.700271  |
| H  | 9.368604  | 1.702143  | 9.869819  |
| H  | 11.240843 | 2.006991  | 12.215836 |
| H  | 9.704887  | -0.306779 | 9.746769  |
| H  | 11.352710 | -1.905043 | 8.770462  |
| H  | 11.891605 | -2.170254 | 10.464209 |
| H  | 10.416355 | -4.054899 | 9.889749  |
| H  | 9.516637  | -3.009515 | 11.037811 |
| H  | 9.116475  | -4.032145 | 2.234278  |
| H  | 9.271448  | -2.416221 | 2.979319  |
| H  | 8.330250  | -2.617015 | 1.472365  |
| H  | 6.254914  | -4.645809 | 1.994365  |
| H  | 7.485987  | -2.176409 | 5.211586  |

|   |           |            |           |
|---|-----------|------------|-----------|
| H | 4.394860  | -4.660075  | 3.765004  |
| H | 11.705557 | -7.778137  | 8.935146  |
| H | 11.371552 | -9.500313  | 8.584943  |
| H | 9.217395  | -7.385543  | 9.372189  |
| H | 8.904043  | -9.108313  | 9.038701  |
| H | 9.478925  | -8.038559  | 7.722716  |
| H | 11.848171 | -9.102302  | 13.280871 |
| H | 10.318575 | -6.504196  | 13.886390 |
| H | 11.820186 | -7.093526  | 14.656598 |
| H | 11.842994 | -5.037205  | 12.828303 |
| H | 13.152860 | -6.282559  | 12.741452 |
| H | 10.590079 | -6.061585  | 11.050250 |
| H | 12.255677 | -6.480584  | 10.501310 |
| H | 8.792511  | -7.681905  | 11.993736 |
| H | 7.311272  | -9.179541  | 14.082084 |
| H | 6.826825  | -9.452790  | 12.389102 |
| H | 5.377482  | -7.700451  | 13.380431 |
| H | 6.340539  | -7.038575  | 12.052827 |
| H | 8.073539  | -6.317917  | 13.895486 |
| H | 6.763361  | -6.562164  | 15.061714 |
| H | 5.373630  | -4.845348  | 13.899516 |
| H | 6.532559  | -4.735775  | 12.571240 |
| H | 6.545725  | -3.165836  | 14.836255 |
| H | 8.799156  | -4.652653  | 12.635517 |
| H | 9.829395  | -2.173296  | 14.792337 |
| H | 8.525444  | -2.406734  | 15.891660 |
| H | 5.701681  | -11.351305 | 6.282709  |
| H | 5.599141  | -11.170990 | 4.504794  |
| H | 4.585525  | -10.157394 | 5.574157  |
| H | 6.659347  | -8.999400  | 6.466101  |
| H | 7.690948  | -10.079668 | 5.518293  |
| H | 6.761598  | -9.136326  | 3.394373  |
| H | 5.317195  | -7.093163  | 5.211815  |
| H | 4.506702  | -8.336517  | 4.200006  |
| H | 5.431517  | -7.010229  | 3.437603  |
| H | 7.915067  | -7.027379  | 5.340554  |
| H | 7.956795  | -6.920553  | 3.560904  |
| H | 8.877524  | -8.213492  | 4.399534  |
| H | 3.111275  | -7.419244  | 6.131938  |
| H | 1.565035  | -8.183163  | 5.676274  |
| H | 0.332029  | -6.296023  | 6.780028  |
| H | 3.128432  | -4.987035  | 7.024888  |
| H | 2.124609  | -5.532627  | 8.396639  |
| H | 1.571594  | -4.182388  | 7.365609  |
| H | 2.337241  | -5.461562  | 4.576423  |
| H | 0.812132  | -4.608396  | 4.952095  |
| H | 0.766767  | -6.280473  | 4.302751  |
| H | 2.523059  | -10.074153 | 9.699979  |
| H | 4.261446  | -7.983715  | 11.140535 |
| H | 4.443514  | -9.760912  | 11.167332 |
| H | 6.128335  | -8.255053  | 9.600321  |
| H | 5.416841  | -9.739990  | 8.888808  |

|   |          |           |           |
|---|----------|-----------|-----------|
| H | 4.485804 | -6.832642 | 8.527570  |
| H | 4.659088 | -8.109720 | 7.278795  |
| H | 2.539896 | -6.537009 | 10.483951 |
| H | 0.186715 | -7.113471 | 12.213954 |
| H | 0.174183 | -5.667455 | 11.156299 |
| H | 0.899967 | -4.917665 | 13.373019 |
| H | 2.301126 | -4.836820 | 12.256612 |
| H | 1.698738 | -7.197154 | 14.492018 |
| H | 7.292966 | -5.362795 | 18.849835 |
| H | 6.711056 | -6.013268 | 17.283850 |
| H | 5.522725 | -5.580932 | 18.555751 |
| H | 4.725875 | -4.326202 | 16.735666 |
| H | 2.792031 | -1.661424 | 13.934865 |
| H | 2.425239 | -0.571360 | 12.554587 |
| H | 3.531638 | -0.028768 | 13.854996 |
| H | 5.209846 | -1.863441 | 13.156073 |
| H | 4.103374 | -2.374465 | 11.871853 |
| H | 1.875597 | -1.737258 | 8.142269  |
| H | 3.122579 | -1.754115 | 6.850206  |
| H | 3.141732 | -0.472116 | 8.105542  |
| H | 3.598437 | -3.492151 | 8.661744  |
| H | 3.704374 | -2.201299 | 9.865310  |
